Figure S2

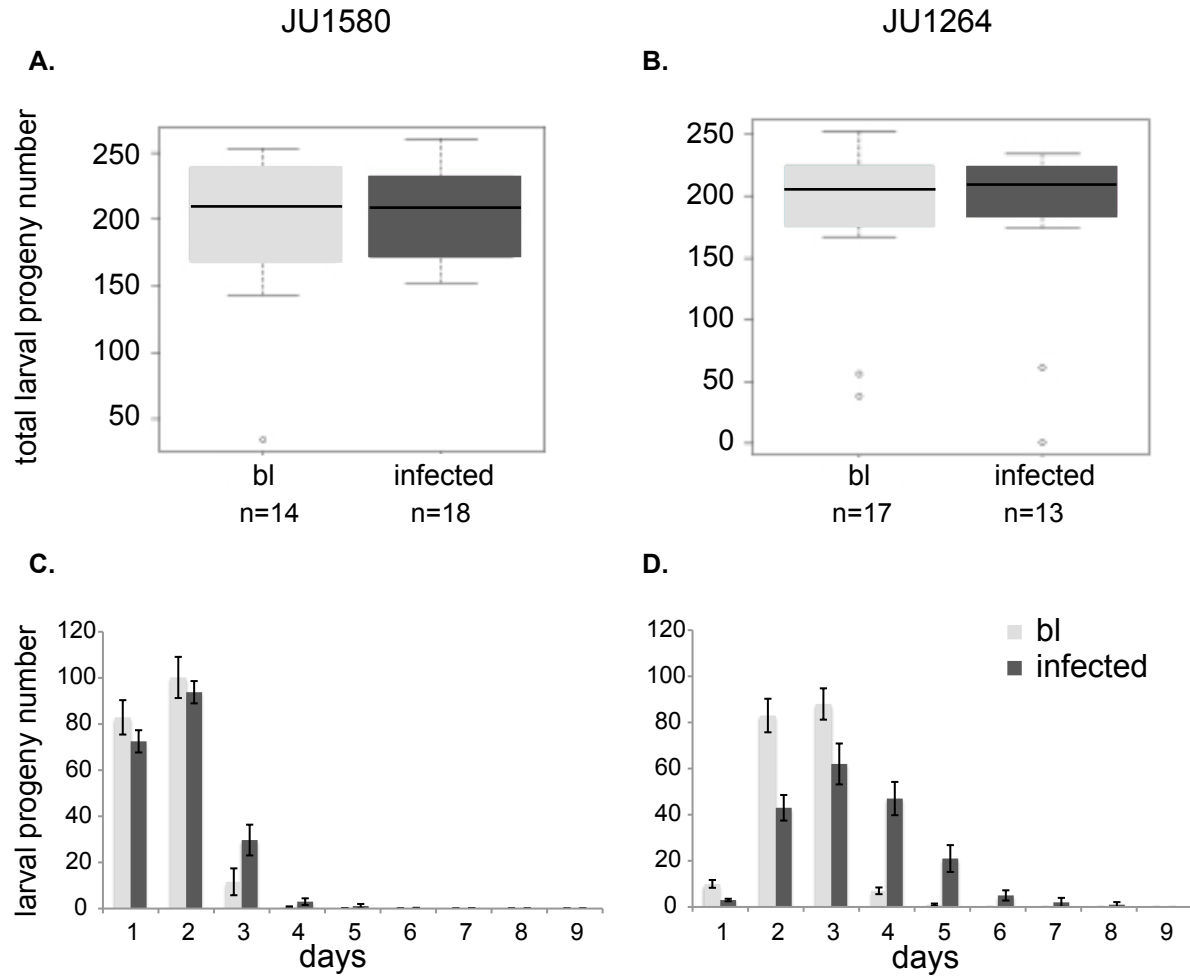

Source: https://storage.googleapis.com/plos-corpus-prod/10.1371/journal.pbio.1000586/1/pbio.1000586.s002.pdf
